1 Non-canonical role of Hippo tumor suppressor serine/threonine kinase 3 STK3 in prostate cancer.

2 Amelia U. Schirmer<sup>1</sup>, Lucy M. Driver<sup>1</sup>, Megan T. Zhao<sup>1</sup>, Carrow I. Wells<sup>2</sup>, Julie E. Pickett<sup>2</sup>, Sean N.

3 O'Bryne<sup>2</sup>, Benjamin J. Eduful<sup>2</sup>, Xuan Yang<sup>2</sup>, Lauren Howard<sup>3</sup>, Sungyong You<sup>4</sup>, Gayathri R. Devi<sup>5</sup>, John

4 DiGiovanni<sup>6</sup>, Stephen F. Freedland<sup>7</sup>, Jen-Tsan Chi<sup>8</sup>, David H. Drewry<sup>2#</sup>, Everardo Macias<sup>1#</sup>.

5

6 <sup>1</sup>Department of Pathology, Duke University School of Medicine, Durham, NC

7 <sup>2</sup>Structural Genomics Consortium, UNC Eshelman School of Pharmacy, University of North Carolina at  
8 Chapel Hill, Chapel Hill, North Carolina 27599-7264, United States

9 <sup>3</sup> Duke Cancer Institute Biostatistics Shared Resource, Duke University, Durham, NC

10 <sup>4</sup>Department of Biomedical Science and Samuel Oschin Comprehensive Cancer Center, Cedars-Sinai  
11 Medical Center, Los Angeles, CA 90048

12 <sup>5</sup>Department of Surgery, Duke University School of Medicine, Durham NC

13 <sup>6</sup>Division of Pharmacology and Toxicology and Dell Pediatric Research Institute, The University of  
14 Texas at Austin, Austin, TX 78723, USA

15 <sup>7</sup>Department of Surgery and Samuel Oschin Comprehensive Cancer Center, Cedars-Sinai Medical  
16 Center, Los Angeles, CA 90048 and the Durham VA Medical Center, Durham, NC 27705

17 <sup>8</sup>Department of Molecular Genetics and Microbiology, Duke University, Durham, North Carolina.

18

19 #Co-corresponding authors

20

21 The authors declare no potential conflicts of interest.

22

23

24 Abstract

25 Serine/threonine kinase 3 (STK3) is an essential member of the highly conserved Hippo Tumor  
26 suppressor pathway which regulates Yes 1 Associated protein (YAP1) and TAZ. STK3 and its paralog  
27 STK4 initiate a phosphorylation cascade that regulate YAP1/TAZ activation and degradation, which is  
28 important for regulated cell growth and organ size. Deregulation of this pathway leads to hyper-  
29 activation of YAP1 in various cancers. Counter to the canonical tumor suppression role of STK3, we  
30 report that in the context of prostate cancer (PC), STK3 has a pro-tumorigenic role. Our investigation  
31 started with the observation that STK3, but not STK4, is frequently amplified in PC. A high STK3  
32 expression is associated with decreased overall survival and positively correlates with androgen  
33 receptor (AR) activity in metastatic castrate resistant PC. XMU-MP-1, an STK3/4 inhibitor, slowed cell  
34 proliferation, spheroid growth and matrigel invasion in multiple models. Genetic depletion of STK3  
35 decreased proliferation in several PC cell lines. In a syngeneic allograft model, STK3 loss slowed tumor  
36 growth kinetics *in vivo* and biochemical analysis suggest a mitotic growth arrest phenotype. To further  
37 probe the role of STK3 in PC, we identified and validated a new set of selective STK3 inhibitors, with  
38 enhanced kinase selectivity relative XMU-MP-1, that inhibited tumor spheroid growth and invasion.  
39 Consistent with the canonical role, inhibition of STK3 induced cardiomyocyte growth and had chemo-  
40 protective effects. Our results contend that STK3 has a non-canonical role in PC progression and  
41 inhibition of STK3 may have therapeutic potential for PC that merits further investigation.

42

- 43 **Significance:** Our findings illuminate a new actionable target for PC therapy that would traditionally be  
44 overlooked due to its canonical role as a tumor suppressor in other cancer types.

## 45 **Introduction**

46 Prostate cancer (PC) remains the second leading cause of cancer related deaths in men.  
47 Metastatic castration resistant PC (mCRPC) occurs when PC progresses despite continuous androgen  
48 deprivation therapy. This is largely due to aberrations in the Androgen Receptor (AR), including AR  
49 gene amplification, expression of splice variants, or mutations. Over the past few years, a number of  
50 AR targeted therapies have been FDA approved, including enzalutamide and abiraterone acetate for  
51 mCRPC, and most recently darolutamide and apalutamide. However, in spite of these life prolonging  
52 therapeutic advances, there is no cure for mCRPC, resulting in patients eventually succumbing to the  
53 disease. Thus, there is a need to identify other molecular targets for mCRPC beyond AR.

54 We have focused our efforts on understudied kinases that are correlated with poor cancer  
55 patient outcomes in PC. Kinases are high value targets due to their druggability and have emerged as  
56 the most successful drug target of the 21st century, with more than 60 small molecule kinase inhibitors  
57 approved by the FDA for oncology (1). This enzyme family contains more than 500 members,  
58 presenting a wealth of opportunities for the continued introduction of life extending medicines. Yet, a  
59 large number of kinases are understudied and thus overlooked as potential therapeutic targets (2,3).  
60 Herein we investigate the role of Serine/Threonine Kinase 3 (STK3) also known as STE20-Like Kinase  
61 MST2 a key member of the Hippo Tumor Suppressor signaling pathway.

62 The term “Hippo” is derived from the overgrowth phenotype in drosophila that is associated with  
63 genetic deletion of the *hpo* gene which encodes a Ste-20 family protein kinase that restricts cell  
64 proliferation and regulates apoptosis (4). The mammalian homolog *STK3* gene and its paralog *STK4*,  
65 encode what are commonly referred to as MST2 and MST1 kinases, respectively. *STK3* and *STK4* are  
66 essential members of the highly conserved Hippo Tumor Suppressor pathway (4,5) (*hereafter, simply*  
67 *STK3 and STK4 kinases*). Mammalian *STK3/4* kinases bind to adaptor protein Salvador homolog 1  
68 (SAV1), phosphorylate large tumor suppressor homolog 1/2 (LATS1/2) and Mob kinase activator  
69 (MOB1). Phosphorylation of homologous transcriptional co-activators Yes Associated protein (YAP) and

70 transcriptional co-activator with PDZ binding motif (TAZ) by LATS1/2 ensues which leads to their  
71 cytoplasmic retention or degradation (6). Inactivation or loss of Hippo kinase signaling leads to non-  
72 phosphorylated active YAP/TAZ, which promotes cell proliferation and inhibits apoptosis. YAP/TAZ  
73 transcriptional oncogenes are hyperactivated in many cancer types (6,7). Hyper-activation of YAP in PC  
74 has been observed in a number of studies (8). Thus, the consensus would be that loss of STK3/4 Hippo  
75 kinase signaling results in hyperactivation of YAP/TAZ. However, our analysis of genomic data shows  
76 that STK3, but not STK4, is amplified human PCs and correlates with worse patient outcomes. Thus, we  
77 hypothesized that STK3 may have a non-canonical pro-tumorigenic role in PC.

78           Given the high value of STK3 as an actionable target and the urgent need for new molecular  
79 targets in PC, we sought to investigate a potential non-canonical pro-tumorigenic role of STK3. To  
80 complement STK3 molecular genetic studies, we utilized available STK3/4 inhibitor XMU-MP-1 and  
81 identified novel complementary series of STK3 small molecule inhibitors with different structures,  
82 narrower kinase inhibition profiles, and more potent cellular activity. These small molecules may also  
83 be useful tools for the research community to elucidate STK3 function in other disease contexts. Our  
84 cumulative data support that STK3 has a non-canonical pro-tumorigenic role in PC, which may be  
85 targeted by small molecule inhibitors to reduce PC growth and progression.

86

## 87 **Materials and Methods**

### 88 ***Cell lines and culture conditions***

89 Hi-Myc ventral prostate 2 cells (HMVP2) were a gift from Dr. John DiGiovanni (9). C4-2 cells  
90 were obtained from the Chen Lab at Duke University. Cell lines were authenticated by STR profiling  
91 and tested for mycoplasma at Duke University cell culture facility by MycoAlert PLUS test Lonza.  
92 DU145 and 293T cells were grown in Dulbecco's Modified Eagle Medium (DMEM) + 10% fetal bovine  
93 serum (FBS). PC3, 22RV1, HMVP2, C4-2 and LNCaP cells were cultured in RPMI + 10% FBS. LAPC-4  
94 cells, a gift from Dr. William Aronson at UCLA, were cultured in Iscove's Modified Dulbecco's Medium  
95 (IMDM) + 10% fetal bovine serum (FBS) + 1nM R1881. For androgen deprivation charcoal stripped  
96 FBS (CSS)(MilliporeSigma, St. Louis, MO., USA) was used instead of FBS in media.

### 97 ***Western blots***

98 Cells were collected in radioimmunoprecipitation assay buffer (RIPA) lysis buffer with protease  
99 cocktail inhibitor 1 and phosphatase cocktail inhibitor 2 and 3 (MilliporeSigma). For tumor biochemical  
100 analysis tumoral tissues were ground in liquid nitrogen with a mortar and pestle and then extracted with  
101 RIPA. Protein was quantified using DC Bio-Rad protein assay (Bio-Rad, Hercules, CA., USA) and 30 to  
102 60 µgs of protein were run on SDS-PAGE gels and transferred onto 0.45 or 0.22 µmol/L nitrocellulose.  
103 Antibodies p-MOB1(Thr35), MOB1, Cyclin D1, p-YAP(Ser397), p-YAP(Ser127), YAP, STK4, TAZ,  
104 CDK1(Tyr15), p-STAT3 (Cell Signaling Technology, Danvers, MA USA) were all used at 1:1,000  
105 dilution. Antibodies for GAPDH and AR (Cell Signaling Technology) used at 1:4,000 and 1:2,000  
106 dilution respectively. Antibody for STK3 (ThermoFisher, Waltham, MA., USA) used at 1:2,000 dilution.  
107 For Western blot quantification, ImageJ 1.52a software was utilized to quantify band densitometry and  
108 Actin or GAPDH loading controls for normalization. When shown as percentage, treatment group ratios  
109 were divided by control group ratio (100%) and multiplied by 100.

### 110 ***Cell proliferation assays***

111 For two-dimensional proliferation assays, cells were plated in a 96-well clear walled, clear  
112 bottom plates and after 24 hours, cells were treated as specified for 120-192 hours using DMSO as a  
113 vehicle. For three-dimensional spheroid assays, cells were plated in 96 well, clear walled, ultra-low  
114 attachment plates and after 24 hours when spheres formed, cells were treated for 144-192 hours with  
115 DMSO as a control. Proliferation studies were conducted on an IncuCyte S3 live-cell imaging system  
116 (Sartorius, Ann Arbor, MI., USA) on 96 whole-well scan mode. Plates were imaged every 8-24 hours  
117 and quantified with bundled image analysis software. For real-time cell death assays, Incucyte®  
118 Cytotox Green Reagent (Satorius) was used to indicate dead cells.

### 119 ***Gene Knockdown***

120 For inducible knockdown of STK3 shERWOOD UltramiR lentiviral Inducible shRNA system was  
121 used (Transomics Technologies Inc., Huntsville, AL., USA). To deplete mouse STK3 expression in  
122 HMVP2 cells TRC2 MISSION shRNAs in pLKO.1-puro vector backbone were used (Millipore-Sigma).  
123 Lentivirus was generated with psPAX2 and pMD2.G packaging plasmids using with the Polyplus  
124 jetPRIME transfection kit in 293T cells. Virus was collected at 48 hours post transfection and a 1:1 ratio  
125 of viral media to fresh culture media with 8ug/mL of polybrene infection reagent was incubated for 24  
126 hours on target cells.

### 127 ***Kinetic cell migration and matrigel invasion***

128 Scratch wound migration and matrigel invasion assays were conducted with an IncuCyte S3  
129 live-cell imaging system (Sartorius Bioscience). DU145 cells ( $4.5 \times 10^5$ ) were plated on imagelock 96-  
130 well plates and treated for 24 hours with indicated drug. Cells were then washed twice with PBS, and a  
131 96-pin wound making tool was used to make a uniform scratch in all 96 wells simultaneously (IncuCyte  
132 96-well WoundMaker Tool, cat. # 4563). For cell migration (no matrigel) assays, complete DMEM with  
133 or with out treatment was added to wound with indicated treatments and plate imaged over time. For  
134 matrigel invasion assays, scratch wound was overlaid with 3 mg/mL of matrigel and incubated for 1

135 hour at 37°C, and then overlaid with 100 µL of complete DMEM with indicated treatments and imaged  
136 over time. Quantification was conducted using the IncuCyte Scratch Wound software module. For  
137 three-dimensional spheroid invasions, 500 cells were plated in PrimeSurface 3D culture, ultra-low  
138 attachment, 96 well, U bottom, clear plates 50 µL of media for 24 hours to allow spheres to form (S-  
139 BIO, Hudson, NH USA). Then matrigel was gently mixed for final concentration of 3 µg/mL and  
140 incubated for 1 hour at 37°C, and then overlaid with 100 µL of RPMI media and indicated treatment.  
141 Quantification was conducted using the IncuCyte spheroid software module.

### 142 ***In vivo* syngeneic allograft study**

143 Mouse experiments were conducted as approved by the Duke University IACUC board protocol  
144 number IACUC006565. Briefly, 32 male FVB/N mice aged 6 weeks (Charles River Laboratories Raleigh  
145 NC, USA) were injected with HMVP2 spheroids grown in ultralow attachment plates as previously  
146 described (9). Approximately  $2 \times 10^5$  cells were injected in 1:1 RPMI to matrigel per animal  
147 subcutaneously in the right flank. Caliper measurements were commenced 14 days after inoculation  
148 three times per week and animal body weights measured twice a week. Tumor volumes were  
149 calculated using the formula  $L \times (W)^2/2$ . At terminal endpoint, wet tumor weights were recorded, tumoral  
150 tissues divided and fixed in formalin or flash froze in liquid nitrogen.

### 151 **NanoBRET Assays**

152 Intracellular NanoBRET assays were performed as previously described (10) using NanoLuc®-  
153 STK3 Fusion Vector Cat.# NV4301 (Promega, Madison, WI, USA). Briefly, NanoLuc-STK3 along with  
154 carrier DNA was transfected into HEK-293 cells in a 96 well format. NanoBRET Tracer K10 was used  
155 at a concentration of 1 µM to test compounds at 11 concentrations. To measure NanoBRET signal,  
156 NanoGlo substrate (Promega) at 1:166 to Opti-MEM media in combination with extracellular NanoLuc  
157 Inhibitor (Promega) diluted 1:500 was combined to create a 3X stock solution. A total of 50 µL of the 3×  
158 substrate/extracellular NanoLuc inhibitor was added to each well. The plates were read within 10



159 minutes on a GloMax Discover luminometer (Promega). Biological replicates were normalized and fit  
160 using a sigmoidal, 4 parameter logistic regression binding curve in Prism Software (GraphPad, La Jolla,  
161 CA, USA). IC<sub>50</sub> and standard error (SE) were calculated in Prism Software.

## 162 **Enzyme Assays**

163 Assays were performed at Eurofins discovery services (Celle-L'Evescault, France) as previously  
164 described (11). Investigational compounds were provided as 10 mM stock solutions and screened in  
165 10-point dose–response at the Km of ATP using 2-end recombinant STK3 protein and myelin basic  
166 protein as a substrate.

## 167 **Compound Kinase Selectivity**

168 KINOMEScan scanMax assay panel was performed at Eurofins DiscoverX (San Diego, CA.,  
169 USA) across 403 wild-type human kinases and 65 mutant human kinases at a compound concentration  
170 of 1 µM as previously described (12). Selectivity score 10 or S<sub>10</sub> (1 µM) was used for compound  
171 selectivity metric, where the threshold is 10% of activity remaining relative to control for a given kinase.  
172 S-score is calculated by dividing the number of inhibited protein kinases at or above this threshold, by  
173 the total number of tested protein kinases.

## 174 **Statistical analysis.**

175 GraphPad Prism 9.0.0 was used for statistical analysis of *in vitro* studies. For time-course live cell  
176 proliferation assays and migration/invasion assays, 2-way repeated measures ANOVA multiple  
177 comparison analysis was conducted with Dunnett's multiple comparison test for adjusted p-value both  
178 with alpha=0.05. Tumor growth kinetics *in vivo* were analyzed using a generalized estimating equation  
179 with exchangeable correlation to test if tumor volume growth varied over time between the three treatment  
180 arms. Time was treated as a categorical variable to not assume linear growth. P<0.05 was considered  
181 statistically significant. Copy number alteration (CNA), transcriptome profiles, and clinical information of  
182 patient data were downloaded from cBioPortal and Log-rank Mantel-Cox test was performed to estimate

183 significance of survival difference and hazard ratio between stratified groups. For gene correlation studies  
184 we used a web-based software named the Prostate Cancer Transcriptome Atlas (PCTA)(13).  
185 Androgen\_Response hallmark gene set activation score was computed by using Z-score method (14).  
186 Correlations were computed by Spearman's rank correlation method.

187

188

189 **Results**

190 **STK3 gene is amplified in PC.**

191 Analysis of genomic data from 158 non-redundant studies in the cBioPortal with a cut off of  $\geq 10\%$   
192 copy number alteration (CNA) frequency shows that STK3 is amplified in a number of cancer cohorts  
193 (Fig. 1A) (15). Of the 14 cohorts with  $\geq 10\%$  STK3 amplification, 4 were PC cohorts. In contrast, no PC  
194 cohort showed a  $\geq 10\%$  amplification of STK4 (Fig 1B).

195

196 **STK3 correlates with worse outcomes in PC.**

197 Progression free survival analysis of patients from the TCGA prostate adenocarcinoma cohort  
198 (n=489) shows significant difference in time to progression in STK3 amplified patients (n=41) compared  
199 to STK3 diploid patients (n=448) (HR = 1.94, 95%CI 0.91-4.15, p=0.024, Log-rank) (Fig. 1C). TCGA  
200 prostate adenocarcinomas with increased STK3 gene copy number were associated with increased  
201 STK3 mRNA levels (Fig. 1D). Next, we queried patients with available RNA-Seq gene expression and  
202 survival data from the metastatic Stand Up 2 Cancer/Prostate Cancer Foundation cohort (SU2C/PCF)  
203 (16). Patients were stratified into lower median (STK3 low, n=36) and upper median STK3 expression  
204 (STK3 high, n=35) groups by mRNA expression z-scores for survival analysis. Compared to STK3 low  
205 expression group, STK3 upper median expression group had a significantly decreased survival rate,  
206 median survival 30.7 vs 22.2 months, respectively (HR= 1.78, 95%CI 0.961 to 3.218, p= 0.042, Log-rank)  
207 (Fig. 1E). Importantly, when we stratified patients by STK4 median expression, there was no statistically  
208 significant difference in survival between groups (Log-rank p= 0.263) (Fig. 1F).

209 Given STK3 is frequently amplified in breast cancer (BC), we also queried BC outcomes (Fig. 1  
210 G-H). Patient samples from the TCGA Invasive Breast Cancer cohort stratified by STK3 above the  
211 median upper expression levels compared to lower STK3 expression showed significantly decreased  
212 overall survival (HR= 1.84, 95%CI 1.314 to 2.580 p= 0.0005, Log-rank). When BC patients were stratified  
213 by STK4 median expression, there was no significant difference in overall survival (Log-rank p=0.825).

214

215 **STK3 gene expression is correlated with AR activity in mCRPC.**

216 To determine if STK3 plays a role in AR dependent or independent PCs, we next ran correlative  
217 analysis of STK3 or STK4 gene expression and AR response signature  
218 (HALLMARK\_ANDROGEN\_RESPONSE) across PC disease states. For STK4 and AR response, there  
219 was a negative or no significant correlation observed (Fig. 1I). However, STK3 gene expression and AR  
220 response gene signature had a significantly positive correlation at every disease state with the highest  
221 correlation in the mCRPC setting (Spearman's rho value =0.33, p= 0.001). Altogether, analysis of STK3  
222 in human PC specimens suggest that STK3 may play a role in lethal AR driven mCRPC.

223

224 **STK3 expression in PC cell lines.**

225 Across commonly used PC cell lines, there was a trend for an inverse relationship between STK3  
226 and STK4 protein expression (Fig 2A). In addition, in AR positive cell lines STK3 tends to be higher and  
227 YAP/TAZ expression lower. Exploring PC cell lines for syngeneic studies, we found Hi-Myc Ventral  
228 Prostate 2 (HVMP2) cell line derived from the commonly Hi-Myc transgenic PC mouse model, has  
229 significantly elevated levels of STK3 (Fig. 2A).

230

231 **STK3/4 inhibitor, XMU-MP-1, slows PC and BC cell growth and matrigel invasion.**

232 First, we wanted to determine if STK3 is a potential druggable target in PC. To this end, we utilized  
233 the available STK3/4 small molecule inhibitor XMU-MP-1 across a battery of cell lines (17). In LNCaP,  
234 22RV1 and PC-3 cells, we observed a dose dependent decrease in proliferation rates with XMU-MP-1  
235 treatment (Fig. 2B). In addition, growth of LAPC-4 3D spheroids was significantly blunted with XMU-MP-  
236 1 in a dose dependent manner (Fig. 2C-D). Western blot analysis of LNCaP and LAPC-4 cell lysates  
237 treated with 10  $\mu$ M XMU-MP-1 showed decreased levels of p-MOB1 and phospho-YAP at both Ser127  
238 and Ser397, denoting activated YAP, yet PC cells were growth inhibited (Fig. 1). Consistent with slowed

239 proliferation rates, cell cycle progression marker cyclin D1 was down regulated 18hrs post XMU-MP-1  
240 treatment.

241           Given that STK3 is also frequently amplified in BC (Fig 1A), we also tested the effects of XMU-  
242 MP-1 on BC cells. Similar to our observations in PC cell lines, western blot analysis of BC cell lines  
243 treated with XMU-MP-1 also displayed reduced phosphorylation of YAP, but reduced cell proliferation  
244 marker Cyclin D1 (Fig. 2F). Verteporfin, a know YAP inhibitor treatment for 18hrs was used as a positive  
245 control. In longitudinal proliferation assay, MDA-MB-231 and SUM-149 BC cells, were also growth  
246 inhibited in a dose dependent manner (Fig. 2G). Similar results were observed in various three-  
247 dimensional BC spheroid models (Fig 2H). Together, data from PC and BC cells, shows that STK3/4  
248 inhibition with XMU-MP-1 results in reduced cell proliferation despite YAP1 activation (reduced  
249 phosphorylation).

250

### 251 **Genetic depletion of STK3 slows PC cell proliferation**

252           We utilized shRNA to test if STK3 is essential for PC cell proliferation (Fig 3A and SX). Western  
253 blot validation of STK3 inducible knockdown coincides with reduced levels STK3 phospho-target p-MOB1  
254 Thr35. Importantly, STK4 levels are not induced to compensate for STK3 loss. In addition, we observed  
255 increased levels of cell cycle inhibitor p27. Modest increases in YAP1 Ser127 were observed but appear  
256 in non-targeting doxycycline treated cells as well. This indicates that YAP is not activated in this model  
257 due to loss of STK3. In LNCaP, C4-2 and HMVP2 cell lines, STK3 knockdown with two shRNAs  
258 compared to non-targeting shRNA control, resulted in significantly reduced proliferation rates (Fig. 2B-  
259 C). In LAPC-4 3D spheroid model, STK3 gene knockdown also resulted in slowed tumor spheroid growth  
260 kinetics (Fig. 3D-E).

261

### 262 **STK3 in castrate growth conditions**

263           Given that STK3 is amplified in advanced mCRPC cohorts, we asked whether STK3 plays a role  
264 in hormone independent PC cell growth. For these studies we utilized charcoal stripped serum (CSS) to  
265 mimic androgen deprivation conditions and as a control we used low serum growth conditions.  
266 Interestingly, after 72hrs of growth in CSS, STK3 protein levels and activity (p-MOB1) were increased  
267 (Fig. 3F). Consistent with nutrient/hormone deprived growth conditions we found reduced levels of cell  
268 cycle marker cyclin D1 and AR target gene PSA. In both LNCaP and C4-2 cell lines grown in CSS, STK3  
269 loss resulted in blunted proliferation compared to non-targeting control (Fig. 3G). Morphologically, C4-2  
270 cells with STK3 knockdown, when compared to shNT cells, had increased cytoplasmic volume and were  
271 multinucleated (Fig. 3H). Together, these data indicate that STK3 plays a role in castration resistant PC  
272 cell proliferation. Thus, STK3 may impart growth advantage under androgen-deprived growth conditions.  
273

#### 274 **STK3 knockdown slows allograft tumor growth *in vivo*.**

275           To determine the role of STK3 on PC growth *in vivo* we utilized HMVP2 syngeneic allograft model.  
276 Loss of STK3 *in vivo* showed an overall statistically significant interaction ( $p < 0.0001$ ) between treatment  
277 arm and time, which tests whether tumor volume differs by treatment (i.e. shSTK3 vs shNT) over time  
278 (Fig. 3I). On pairwise comparison, shSTK3-1 ( $p < 0.001$ ), but not shSTK3-2 ( $p = 0.23$ ) was significantly  
279 different compared to shNT control arm. At the experimental endpoint, similar results were observed with  
280 tumor weights (Fig. 3J). Biochemical analysis of pooled tumor protein lysates ( $n = 6$  tumors per group),  
281 confirmed reduced levels of STK3 in shSTK3 tumors compared to shNT control tumors (Fig. 3K).  
282 Interestingly, we did not observe reduced levels of p-MOB1 in STK3 depleted tumors. However, loss of  
283 STK3 *in vivo* resulted in reduced levels of p-CDK1 Tyr15, a previously described STK3 downstream  
284 target (18). In addition, we observed decreased levels of cleaved Caspase 3 and the proapoptotic protein  
285 PUMA in shSTK3 tumors compared to shNT tumors. These data suggest that STK3 loss *in vivo* results  
286 in slowed tumor growth kinetics due to cell cycle alterations and not cell death due to hyper-activation of  
287 YAP as described in other models (19).

288

### 289 **Identification and validation of novel STK3 small molecule inhibitors.**

290 To identify new medicinal chemistry starting points for targeting STK3, our team screens diverse  
291 kinase inhibitors in a large assay panel, and carefully scrutinized previously published kinome data (20).  
292 Through this literature mining, we identified two independent scaffolds (Fig. 4A) disclosed as inhibitors of  
293 well-studied kinases that also possess what we perceived to be exploitable off-target STK3 inhibition  
294 (21,22). One lead, alias UNC-BE4-017, referred to as compound A1 hereafter, is a pyrrolopyrazine that  
295 was originally disclosed in a medicinal chemistry campaign targeted at the JAK kinases (22). The  
296 compound potently inhibits JAK1, 2, and 3, but only 3 kinases, one being STK3, out of the panel of 48  
297 are inhibited >90% indicating good kinase selectivity for a starting point. The second lead, alias UNC-  
298 SOB-5-16, referred to as compound B1 hereafter, a pyrrolopyrimidine, came from a literature series  
299 designed to target the kinase LRRK2 (21). It is also an inhibitor of STK3, with an  $IC_{50} = 22$  nM and in the  
300 DiscoverX KINOMEScan panel of 451 kinase assays only 10 kinases give a percent of control (PoC) <90  
301 at 1  $\mu$ M. Thus, compounds A1 and B1 are very selective across the kinome with only a handful of off-  
302 targets. We synthesized these lead compounds and some additional analogs from each series to test for  
303 STK3 engagement and inhibition (**Supplemental Materials and Methods**).

304

### 305 **Validation of lead scaffolds and STK3 target engagement.**

306 First we utilized p-MOB1 Thr35, a widely validated STK3/4 phospho-substrate as a readout for  
307 STK3 inhibition in cells (23). As shown in Fig. 4B, 30 min treatment with compounds A1, A2, B1, B2 and  
308 XMU-MP-1 resulted in reduced STK3 activity at the 10  $\mu$ M dose. However, A1 and B2 were more potent,  
309 blocking MOB1 phosphorylation at lower doses (Fig. 4B). We next employed an STK3-NanoBRET assay  
310 to quantitate STK3 occupancy and affinity of our compounds in live cells (10). In STK3-NanoBRET assay,  
311 A1 and B2 were found to have the lowest in cell  $IC_{50}$  values, 7.6 and 2.7  $\mu$ M, respectively (Fig. 4C). XMU-  
312 MP-1 was found to have an  $IC_{50}$  of 8.4  $\mu$ M, which coincided well with western blot results. Of note, B3

313 showed no activity in western blot assays and an IC<sub>50</sub> out of range (>10 μM) in the STK3 NanoBRET  
314 assay, indicating strong congruency between these assays. Compounds were further evaluated using  
315 radiometric enzyme kinases assays using human recombinant STK3, STK4, STK24 (aka MST3) and  
316 STK26 (aka MST4) kinase assays (Table 1). Enzymatic IC<sub>50</sub> values for A1 and B2 were in the low  
317 nanomolar range, 41 and 33 nM, respectively.

318 Quantitative densitometry analysis of western blots of p-MOB1 in HMVP2 cells treated with 1 μM  
319 for 30 min shows approximately 75% reduction of p-MOB1 in cell lysates treated with A1 and B2 (Fig.  
320 4D). Compounds in series A are derived from JAK inhibitors and accordingly we observed a modest, but  
321 significant reduction of p-STAT3 Tyr705 in A1 treated cells only. Compounds in series B are derived from  
322 LRRK2 inhibitors; however, phosphorylation of LRRK2 at autophosphorylation site S1292 was not  
323 detected in PC cells (24). We tested A1 and B2 against HMVP2 tumor spheroid growth, which have a  
324 high level of STK3 expression (Fig. 2A). As shown in Fig. 4E-F, both compounds inhibited HVMP2  
325 spheroid growth by over 50% at 10 μM doses.

326

### 327 **STK3 chemical tools have a protective effect in H9C2 cardiomyocytes.**

328 To determine if our investigational compounds are specific to STK3 or have a general toxic effect  
329 we utilized the rat H9C2 cardiomyocyte cell line, which are protected from ROS induced apoptosis by  
330 activation of YAP including with XMU-MP-1 (25). As shown in Fig. 4G, treatment with increasing doses  
331 of A1 and B2 for 72hr had modest growth stimulatory effects on H9C2, nonetheless divergent from effects  
332 observed in PC or BC cells. To determine if inhibition of STK3 has a cardio-protective effects we treated  
333 cells with a lethal dose of doxorubicin (500 nM) alone or in combination with A1 and B2 (1 μM). Real-time  
334 quantitation of cell death showed a steady induction of H9C2 cell death with doxorubicin, which was  
335 partially, but significantly, blunted by co-treatment with STK3 inhibitors A1 and B2. Similar chemo-  
336 protective effects were observed with the taxane docetaxel (Fig. 4I). These data are consistent with



337 inhibition of canonical Hippo Tumor suppressor function that leads to activation of YAP/TAZ in  
338 cardiomyocytes.

339

### 340 **Kinome Selectivity Screening**

341 A1 and B2 were screened for selectivity against a panel of 468 kinases at a 1  $\mu$ M dose. Both  
342 compounds showed a high degree of selectivity (Fig. 4J). A1 inhibited 10 kinases other than STK3 by  
343 greater than 90% with an  $S_{10}$  (1 $\mu$ M) of 0.027. B2 inhibited only 8 other kinases by >90% of control with  
344 an  $S_{10}$  (1 $\mu$ M) of 0.022. Kinases with >90% inhibition for A1 and B2 are depicted in Table S1.

345

### 346 **Pyrolopyrimidine (Series B) analogues have increased potency.**

347 Given our encouraging previous results, we proceeded to synthesize and screen additional  
348 analogues from both BE4 and SOB-5 scaffolds. Compounds were tested using recombinant protein  
349 radiometric assays and in cell STK3 NanoBRET target engagement assays (Table 1 and Fig. S1). From  
350 these two assays, compounds with a NanoBRET  $IC_{50}$  <2.5  $\mu$ M and enzymatic  $IC_{50}$  < 200 nM were  
351 screened for *in vitro* efficacy. Amongst these, we tested B1, B4, B5, B6, A3 and A4 on HMVP2 spheroids  
352 at a 5  $\mu$ M dose (Chemical Structures in Supplemental Data). Over the course of a 9 day HMVP2 spheroid  
353 assay, B5 and B6 showed the highest efficacy (Fig. 5A). Western blot analysis of HMVP2 lysates treated  
354 with B5 and B6 (1  $\mu$ M) confirm inhibition of STK3 activity as measured by loss of p-MOB1 T35 to a level  
355 of approximately 75% inhibition for both compounds (Fig. 5C-D). We also screened a number of these  
356 compounds against off targets identified in our kinome selectivity screen (Fig 4J, Table S1). Consistent  
357 with recombinant JAK3 enzyme assays (Table S2), B6, but not B5 significantly reduced levels of JAK3  
358 phospho-target p-STAT3 Tyr705, albeit a modest reduction relative to STK3 inhibition.

359 We next conducted dose response curves using STK3 high expressing HMVP2 (Fig. 5E) and  
360 STK3 low expressing LAPC-4 (Fig. 5F) spheroid models. Non-linear curve fit to determine IC<sub>50</sub> values of  
361 B5 and B6, which showed lower IC<sub>50</sub> values in HMVP2 cells compared to LAPC-4 (Fig. 5G).

362

### 363 **STK3 inhibition and loss inhibits PC cell invasion.**

364 Next, we tested the effects of STK3 inhibition on in 3D matrigel invasion of HMVP2 cells. In this  
365 model, we first tested XMU-MP-1 and our two leads A1 and B2. Compared to vehicle control, HMPV2  
366 spheroids treated with each of the three compounds had statistically significant reduced overall spheroid  
367 size and invasion fronts (Fig. S2). We next tested B6, which showed increased STK3 target engagement  
368 and efficacy in HMVP2 3D invasion model (Fig. 6A). B6 dramatically reduced overall 3D matrigel invading  
369 spheroid area in a dose dependent manner (Fig. 6B). In addition, the invading cell front (blue mask) was  
370 universally inhibited at all three doses tested (Fig. 6C). Similarly, genetic depletion of STK3 in HMVP2  
371 cells reduced invasion rates compared to non-targeting control (Fig. 6C-E). Albeit, genetic depletion of  
372 STK3 was not as potent as inhibition with B6, likely due to modest STK3 shRNA knockdown in HMVP2  
373 cells. Together, our chemical and genetic data shows that STK3 plays a role in cell invasion.

374

## 375 Discussion

376 Our investigation originated from the simple observation that STK3, a known tumor suppressor,  
377 is amplified in a subset of cancer types including PC. For this reason, we sought to determine if STK3  
378 plays a non-canonical pro-tumorigenic role in PC. Although this notion contradicts the widely accepted  
379 Hippo Tumor suppressor signaling dogma, the combined value of STK3 as a druggable target and the  
380 need for added molecular targets to combat mCRPC motivated us to investigate this likelihood. Our  
381 study provides genetic and pharmacological evidence that in PC, STK3 is essential for PC cell  
382 proliferation and *in vivo* tumor growth.

383 There is ample evidence that STK3 acts as tumor suppressors in various tumor types other than  
384 PC, however data from the literature does support the possibility that STK3 may have a pro-tumorigenic  
385 role in a cancer type-dependent manner. For example, Hippo Tumor suppressor kinases LATS1 and  
386 LATS2, the immediate downstream phospho-targets of STK3/4, were also shown to be essential for  
387 tumorigenesis in a mouse colon cancer model (19). Likewise, a subset of acute myeloid leukemias  
388 were found to be dependent on STK3 signaling *in vitro* (18). Lastly, in a retrospective PC study, STK3  
389 expression positively correlated with higher Gleason grade and predicted biochemical recurrence in  
390 Taiwanese PC patients (26). Our study expands on the idea that STK3 has a non-canonical role in a  
391 cancer type-dependent manner.

392 Our pharmacological and genetic knockdown studies show that inhibiting STK3 slows PC cell  
393 proliferation (*in vitro and in vivo*) and matrigel invasion. The small molecule inhibitors had effects across  
394 multiple cell lines with the greatest phenotypic consequences in cell lines with the highest expression of  
395 STK3, implicating STK3 as the driver of the response. The impact of the loss of STK3 on invasion is  
396 particularly noteworthy as PC metastasis is the main cause of death in patients. A target that is specific  
397 to this phenotype in metastatic PC or BC, but not growth inhibit or have cytotoxic effects in normal cells  
398 could have pronounced translational impacts. Data from STK3 depleted PC cells and HMVP2 tumors  
399 suggest a cell cycle arrest phenotype as shown by accumulation of p27 *in vitro* and loss of p-

400 CDK1/accumulation of cyclin B1 in HMVP2 tumors. This is consistent with STK3 dependent leukemias  
401 that suggest STK3 regulates CDK1 to promote cell proliferation (18). In HMVP2 STK3 depleted tumors  
402 we did not observe increased cell death as was observed by hyperactive YAP/TAZ due to loss of Hippo  
403 kinase (LATS1/2) signaling in a colon cancer model (19). This suggest that in PC cells STK3 pro-  
404 tumorigenic role differs from the non-canonical role of LATS1/2 in colon cancer.

405 Lastly, we found that STK3 gene expression correlates with AR response gene signature in  
406 mCRPC. Androgen deprivation (CSS) *in vitro* induced STK3 expression and activity. Importantly loss of  
407 STK3 in androgen deprived conditions further slowed cell proliferation. Together this data suggests that  
408 STK3 may promote PC progression from hormone sensitive to castrate resistance. Overall, our data  
409 are consistent with correlative analysis showing STK3 is frequently amplified in PCs and correlates with  
410 worse outcomes in advanced mCRPC.

411 Our study also presents a new set of small molecule tools to dissect the role and functions of  
412 STK3/4. In a screening assay of over 450 kinases, A1 and B2 proved to have a narrow spectrum of  
413 activity that is improved compared to XMU-MP-1. While XMU-MP-1 is a potent STK3 inhibitor, it also  
414 inhibits 23 other kinases by 90% or more, resulting in a selectivity score  $S_{10}$  (1  $\mu$ M) of 0.05 (17). In  
415 comparison, A1 ( $S_{10}$  (1  $\mu$ M) = 0.03) and B2 ( $S_{10}$  (1  $\mu$ M) = 0.02), inhibited 11 and 8 other kinases,  
416 respectively, by 90% or more. Our medicinal chemistry campaign yielded compounds with improved  
417 efficacy (B5 and B6) in the low micromolar range on 3D tumor spheroids and in the sub-micromolar  
418 range on 3D matrigel invasion. Further optimization and *in vivo* evaluation of our compounds is needed,  
419 yet at this point these compounds may serve as tools to further investigate STK3 function in different  
420 contexts.

421 To determine potential off target or general toxicity effects of our STK3 kinase inhibitors we tested  
422 H9C2 cardiomyocytes. Contrary to our observations in PC cells, STK3 inhibitors did not slow H9C2 cell  
423 proliferation. Since STK3 inhibition and activation of YAP have been shown to reduce the effect of  
424 apoptotic stimuli in H9C2 cells, we tested the effects of STK3 inhibitors in combination with the commonly

425 used chemotherapeutics doxorubicin and docetaxel. Consistent with a canonical role for STK3, we found  
426 chemical inhibition of STK3 with our investigational compounds blunted chemotherapy induced  
427 cardiomyocyte cell death. While these are initial observations, it is understood that an STK3 kinase  
428 targeted therapy with combined anti-tumor and cardiac chemo-protective effects would hold high clinical  
429 significance.

430 Overall, our study illustrates that STK3 does not always act as a tumor suppressor and that in  
431 fact, for a subset of PCs, STK3 provides a pro-tumorigenic growth advantage. Loss of STK3 slowed PC  
432 growth and limited invasion potential. We developed potent and specific inhibitors to expand the tools  
433 available for probing STK3 and the Hippo/YAP pathway. Importantly, these inhibitors did not slow  
434 proliferation in cardiomyocytes and instead provided protection from apoptosis, which illustrates the  
435 canonical function of STK3. While deeper mechanistic studies are necessary, our studies support a non-  
436 canonical and actionable role for STK3 in PC growth and progression.

437

- 438 1. Bhullar KS, Lagaron NO, McGowan EM, Parmar I, Jha A, Hubbard BP, *et al.* Kinase-targeted  
439 cancer therapies: progress, challenges and future directions. *Mol Cancer* **2018**;17:48
- 440 2. Rodgers G, Austin C, Anderson J, Pawlyk A, Colvis C, Margolis R, *et al.* Glimmers in  
441 illuminating the druggable genome. *Nature reviews Drug discovery* **2018**;17:301-2
- 442 3. Nguyen DT, Mathias S, Bologa C, Brunak S, Fernandez N, Gaulton A, *et al.* Pharos: Collating  
443 protein information to shed light on the druggable genome. *Nucleic Acids Res* **2017**;45:D995-  
444 D1002
- 445 4. Wu S, Huang J, Dong J, Pan D. hippo encodes a Ste-20 family protein kinase that restricts cell  
446 proliferation and promotes apoptosis in conjunction with salvador and warts. *Cell* **2003**;114:445-  
447 56
- 448 5. Hansen CG, Moroishi T, Guan KL. YAP and TAZ: a nexus for Hippo signaling and beyond.  
449 *Trends in cell biology* **2015**
- 450 6. Zheng Y, Pan D. The Hippo Signaling Pathway in Development and Disease. *Dev Cell*  
451 **2019**;50:264-82
- 452 7. Johnson R, Halder G. The two faces of Hippo: targeting the Hippo pathway for regenerative  
453 medicine and cancer treatment. *Nature reviews Drug discovery* **2014**;13:63-79
- 454 8. Salem O, Hansen CG. The Hippo Pathway in Prostate Cancer. *Cells* **2019**;8
- 455 9. Saha A, Blando J, Fernandez I, Kiguchi K, DiGiovanni J. Linneg Sca-1high CD49high prostate  
456 cancer cells derived from the Hi-Myc mouse model are tumor-initiating cells with basal-epithelial  
457 characteristics and differentiation potential in vitro and in vivo. *Oncotarget* **2016**;7:25194-207
- 458 10. Vasta JD, Corona CR, Wilkinson J, Zimprich CA, Hartnett JR, Ingold MR, *et al.* Quantitative,  
459 Wide-Spectrum Kinase Profiling in Live Cells for Assessing the Effect of Cellular ATP on Target  
460 Engagement. *Cell Chem Biol* **2018**;25:206-14 e11
- 461 11. Gao Y, Davies SP, Augustin M, Woodward A, Patel UA, Kovelman R, *et al.* A broad activity  
462 screen in support of a chemogenomic map for kinase signalling research and drug discovery.  
463 *The Biochemical journal* **2013**;451:313-28
- 464 12. Davis MI, Hunt JP, Herrgard S, Ciceri P, Wodicka LM, Pallares G, *et al.* Comprehensive  
465 analysis of kinase inhibitor selectivity. *Nat Biotechnol* **2011**;29:1046-51
- 466 13. You S KB, Erho N, Alshalalfa M, Takhar M, Ashab HA, Davicioni E, Karnes RJ, Klein EA, Den  
467 RB, Ross AE, Schaeffer EM, Garraway IP, Kim J, Freeman MR. Integrated classification of  
468 prostate cancer reveals a novel luminal subtype with poor outcome. *Cancer Research* **2016**
- 469 14. Levine DM, Haynor DR, Castle JC, Stepaniants SB, Pellegrini M, Mao M, *et al.* Pathway and  
470 gene-set activation measurement from mRNA expression data: the tissue distribution of human  
471 pathways. *Genome Biol* **2006**;7:R93
- 472 15. Gao J, Aksoy BA, Dogrusoz U, Dresdner G, Gross B, Sumer SO, *et al.* Integrative analysis of  
473 complex cancer genomics and clinical profiles using the cBioPortal. *Science signaling*  
474 **2013**;6:pl1
- 475 16. Abida W, Cyrta J, Heller G, Prandi D, Armenia J, Coleman I, *et al.* Genomic correlates of clinical  
476 outcome in advanced prostate cancer. *Proc Natl Acad Sci U S A* **2019**;116:11428-36
- 477 17. Fan F, He Z, Kong LL, Chen Q, Yuan Q, Zhang S, *et al.* Pharmacological targeting of kinases  
478 MST1 and MST2 augments tissue repair and regeneration. *Sci Transl Med* **2016**;8:352ra108
- 479 18. Camgoz A, Paszkowski-Rogacz M, Satpathy S, Wermke M, Hamann MV, von Bonin M, *et al.*  
480 STK3 is a therapeutic target for a subset of acute myeloid leukemias. *Oncotarget* **2018**;9:25458-  
481 73
- 482 19. Pan WW, Moroishi T, Koo JH, Guan KL. Cell type-dependent function of LATS1/2 in cancer cell  
483 growth. *Oncogene* **2019**;38:2595-610
- 484 20. Gaulton A, Hersey A, Nowotka M, Bento AP, Chambers J, Mendez D, *et al.* The ChEMBL  
485 database in 2017. *Nucleic Acids Res* **2017**;45:D945-D54
- 486 21. Henderson JL, Kormos BL, Hayward MM, Coffman KJ, Jasti J, Kurumbail RG, *et al.* Discovery  
487 and preclinical profiling of 3-[4-(morpholin-4-yl)-7H-pyrrolo[2,3-d]pyrimidin-5-yl]benzotrile (PF-

- 488 06447475), a highly potent, selective, brain penetrant, and in vivo active LRRK2 kinase inhibitor.  
489 Journal of medicinal chemistry **2015**;58:419-32
- 490 22. Soth M, Hermann JC, Yee C, Alam M, Barnett JW, Berry P, *et al.* 3-Amido pyrrolopyrazine JAK  
491 kinase inhibitors: development of a JAK3 vs JAK1 selective inhibitor and evaluation in cellular  
492 and in vivo models. Journal of medicinal chemistry **2013**;56:345-56
- 493 23. Gundogdu R, Hergovich A. MOB (Mps one Binder) Proteins in the Hippo Pathway and Cancer.  
494 Cells **2019**;8
- 495 24. Kluss JH, Conti MM, Kaganovich A, Beilina A, Melrose HL, Cookson MR, *et al.* Detection of  
496 endogenous S1292 LRRK2 autophosphorylation in mouse tissue as a readout for kinase  
497 activity. NPJ Parkinsons Dis **2018**;4:13
- 498 25. Tian Y, Song H, Qin W, Ding Z, Zhang Y, Shan W, *et al.* Mammalian STE20-Like Kinase 2  
499 Promotes Lipopolysaccharides-Mediated Cardiomyocyte Inflammation and Apoptosis by  
500 Enhancing Mitochondrial Fission. Front Physiol **2020**;11:897
- 501 26. Huang CY, Huang SP, Lin VC, Yu CC, Chang TY, Juang SH, *et al.* Genetic variants in the  
502 Hippo pathway predict biochemical recurrence after radical prostatectomy for localized prostate  
503 cancer. Scientific reports **2015**;5:8556

504

505

506 **Figure Legends**

507 **Figure 1. Correlative analysis of STK3 and PC patient outcomes.** A) Cancer cohorts with >10%  
508 STK3 and B) STK4 copy number amplification. \* denotes PC cohorts. C) Progression free survival  
509 analysis of STK3 diploid and STK3 amplified patients from TCGA/PRAD,  $p=0.0239$ . D) STK3 mRNA  
510 express z-scores in diploid and STK3 amplified PCs. \*\*\*\* $p<0.0001$ . E) Survival analysis of advance  
511 mCRPC by lower and upper median STK3 expression and F) low and high STK4 expression groups.  
512 Survival analysis of BC patient overall survival in patients stratified by upper ( $n=503$ ) and lower ( $n=503$ )  
513 median expression z-scores of G) STK3 and H) STK4. I) Spearman's rank correlative analysis of  
514 STK4 and STK3 and AR response gene signature. GS=Gleason Score, mCRPC=metastatic castration  
515 resistant PC. Rho and p-values denoted on graph.

516 **Figure 2. Pharmacological inhibition of Hippo Kinases in PC and BC.** A) Expression of STK3 and  
517 STK4 across PC cell lines. B) Cell proliferation assessed by total cell confluence normalized to vehicle  
518 control of 22RV1, PC-3 and LNCaP cells treated with XMU-MP-1 ( $n=5$ /dose), data shown 96hrs post  
519 treatment. C) Graphical representation of LAPC-4 spheroid growth kinetics (spheroid area) over time  
520 and D) representative bright field images of LAPC-4 spheroids treated as denoted with XMU-MP-1  
521 ( $n=5$ ). E) Western blot analysis of denoted PC and F) BC cell lysates treated with 10  $\mu$ M XMU-MP-1  
522 collected at indicated time-points post treatment. Vtp = verteporfin. G) Assesement of BC cell  
523 proliferation and H) BC spheroid growth of three cell lines with various doses of XMU-MP-1 ( $n=5$ /dose).

524 **Figure 3. Assessment of STK3 genetic depletion in PC cells.** A) Western blot validation of STK3  
525 shRNA inducible knockdown (doxycycline 0.5  $\mu$ g/ $\mu$ l) and assessment of denoted proteins. B) Cell  
526 proliferation assays of LNCaP, C4-2B and C) HMVP2 PC cells with shNT or shSTK3s ( $n=4$ ). D) Time  
527 course spheroid growth in LAPC-4 with shNT or shRNAs for STK3. E) Western blot analysis of LNCaP  
528 cell lysates grown in varying serum conditions for 72hrs. F) Cell proliferation assays of LNCaP and C4-  
529 2B grown in CSS ( $n=5$ ). G) Phase images of C4-2B cells with indicated shRNA at 192hrs.



530

531 I) Longitudinal growth kinetics of HMPV2 allograft tumors with shNT (n=8), shSTK3-1 (n=8), shSTK3-2  
532 (n=7), interaction time vs shRNA arm  $p < 0.001$ . Pairwise comparison shSTK3-1 vs. shNT:  $p < 0.001$ ;  
533 shSTK3-2 vs. shNT:  $p = 0.23$ . J) Final tumor wet weight. K) Western blot analysis of pooled tumor  
534 lysates (n=6/shRNA) loaded in technical triplicate.

535 **Figure 4. Identification and assessment of STK3 small molecule inhibitors.** A) Structure of lead  
536 compound A1 and B2. B) Western blot analysis of STK3 target p-MOB1 in HMVP2 cells treated with  
537 denoted compound for 30 minutes. C) STK3-NanoBRET intracellular 11-point IC<sub>50</sub> dose response  
538 curves with denoted compound. D) p-MOB1 and p-STAT3 ratios normalized to GAPDH relative to  
539 vehicle control (n=4). ns= non-significant, \* $p = 0.0473$ , \*\* $p = 0.0017$ , \*\*\* $p < 0.0007$ . E) Efficacy of lead  
540 STK3 compounds on HMVP2 spheroid growth at Day 9 (n=4). F) Representative bright field images of  
541 vehicle or 10  $\mu\text{M}$  treated HMVP2 spheroids at 9 day endpoint. G) H9C2 cardiomyocyte proliferation  
542 assay treated with denoted compounds 72hrs post treatment (n=4) \* $p < 0.05$ , \*\* $p < 0.01$ . H) H9C2  
543 proliferation and cell death monitored by cytotox green dye (GFP) over time treated with vehicle,  
544 doxorubicin (Doxo, 500 nM) or STK3 inhibitors (1  $\mu\text{M}$ ). I) Kinome tree for A1 and B2 at 1  $\mu\text{M}$  doses.  
545 Kinases with 0-35% percent of control remaining activity depicted. STK3 denoted in blue.

546 **Figure 5. Assessment of lead analogues.** A) Representative images of HMVP2 spheroids and B)  
547 percent growth relative to vehicle control at endpoint day 9 treated with 5  $\mu\text{M}$  of depicted STK3  
548 inhibitor. C) Western blot analysis of HMVP2 cells treated for 30 min with B5 and B6 at 1 $\mu\text{M}$  and D)  
549 densitometric analysis normalized to GAPDH. E) HMVP2 spheroid area treated with denoted inhibitor  
550 and representative images at day 9. F) LAPC-4 spheroid area treated as denoted at day 9. G) Curve fit  
551 of HMVP2 and LAPC-4 spheroid growth assays with B5 and B6 for IC<sub>50</sub> calculation.

552 **Figure 6. Pharmacological inhibition and genetic depletion of STK3 slows PC cell invasion.** A)  
553 Representative images of 3D invasion of HMVP2 cells treated as denoted and imaged over time. B)

554 Graphical representation of real-time 3D HMVP2 total spheroid invasion area kinetics and C) cell  
555 invasion front (blue mask). C) Representative images of 3D invasion of HMVP2 with denoted shRNAs  
556 treated. 2way RM ANOVA \* $p=0.01$ , \*\*\*\* $p<0.0001$ .

557

558

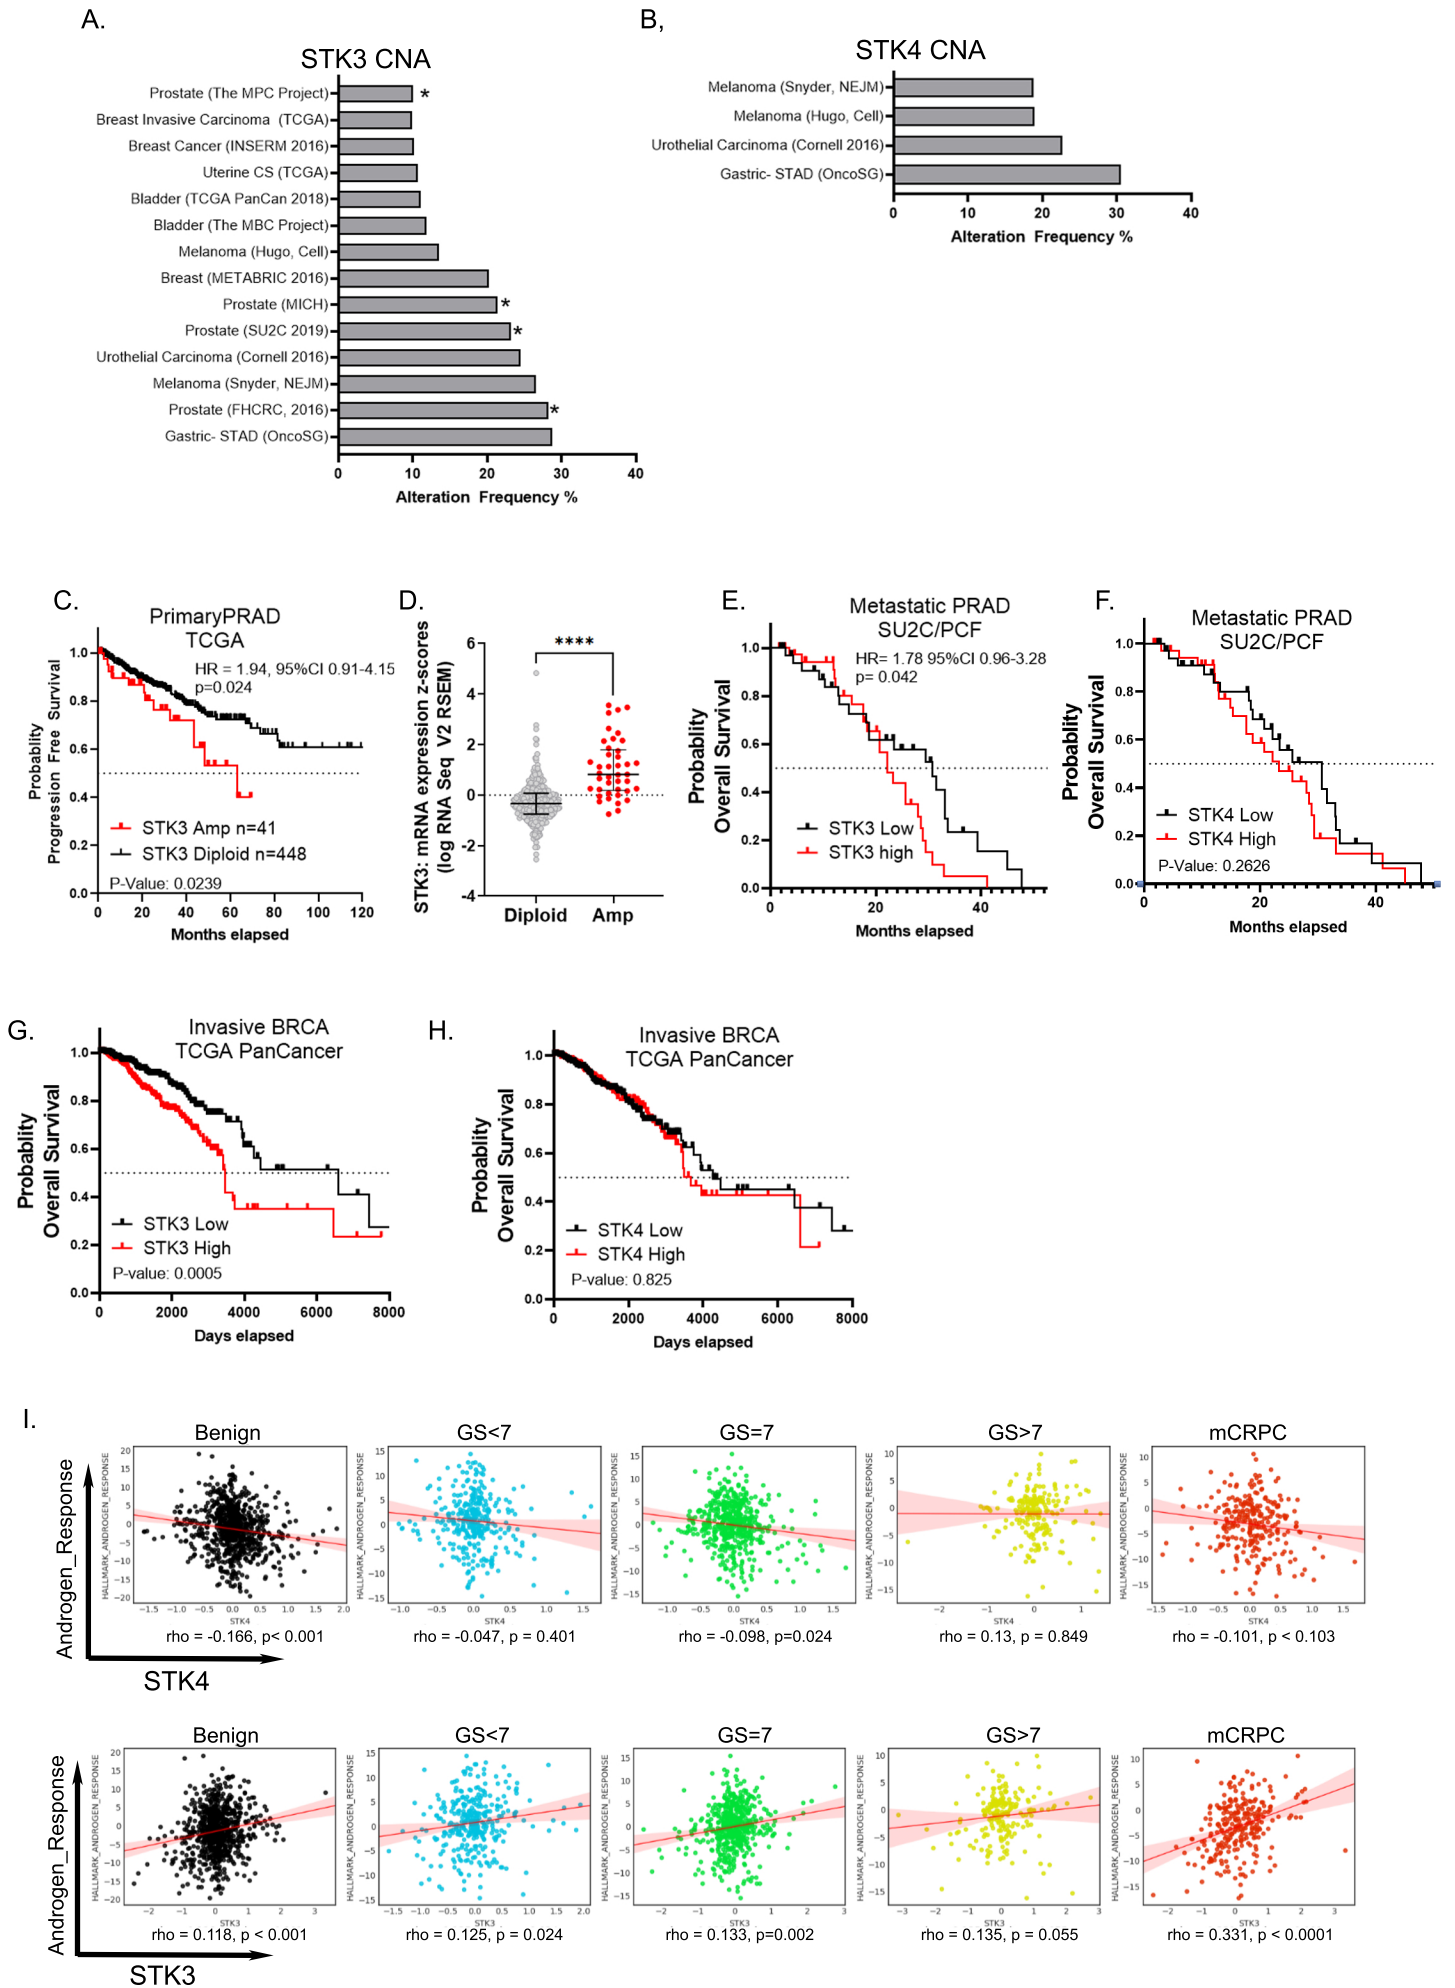

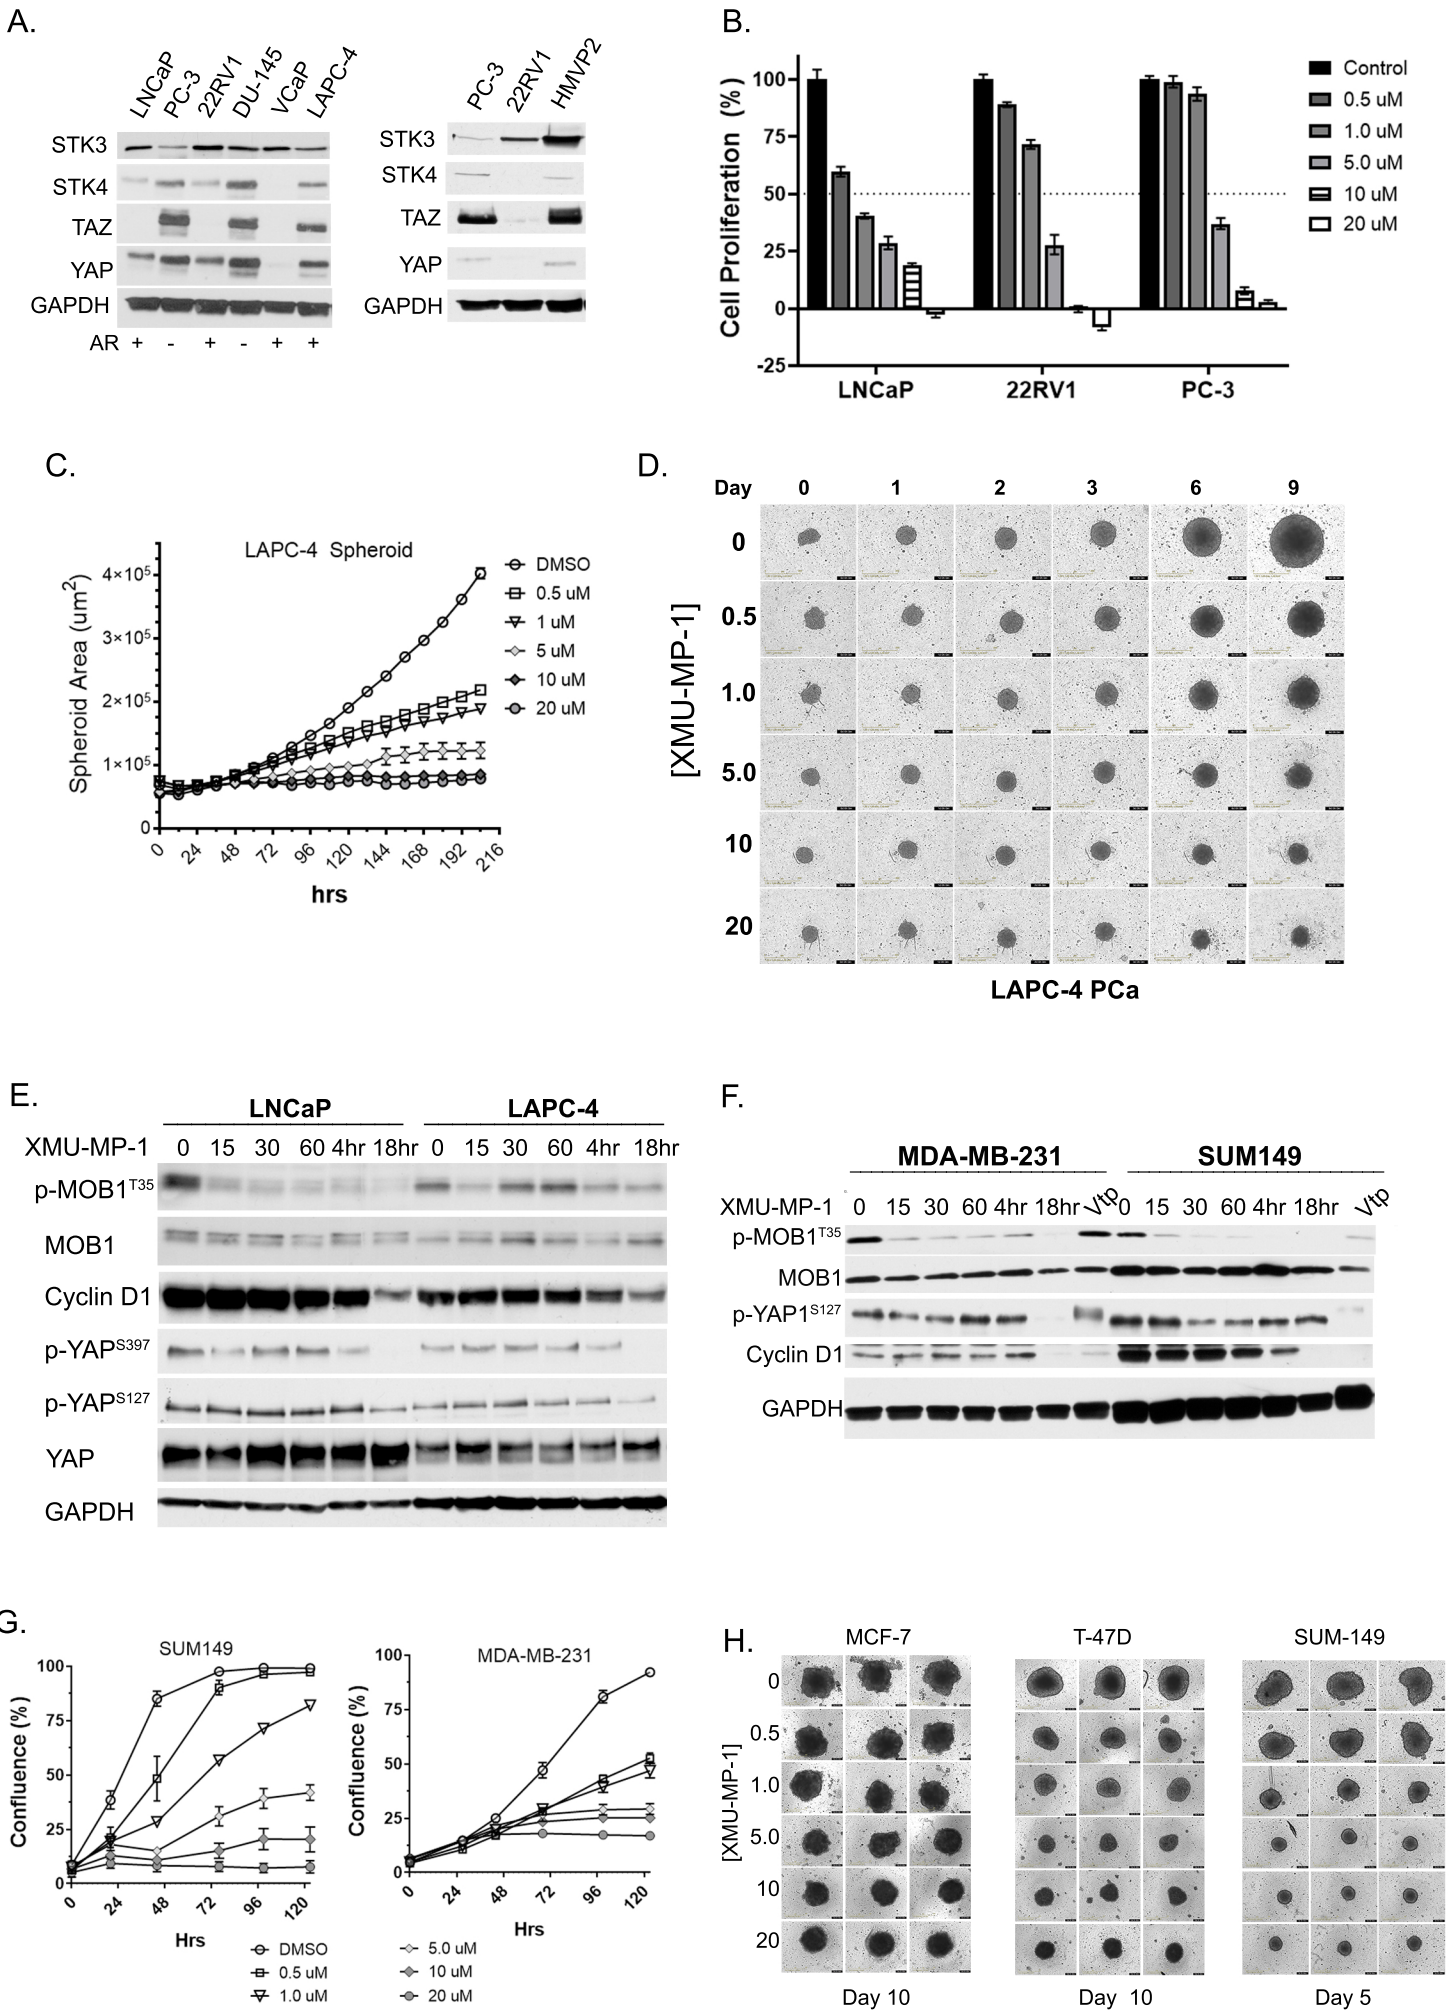

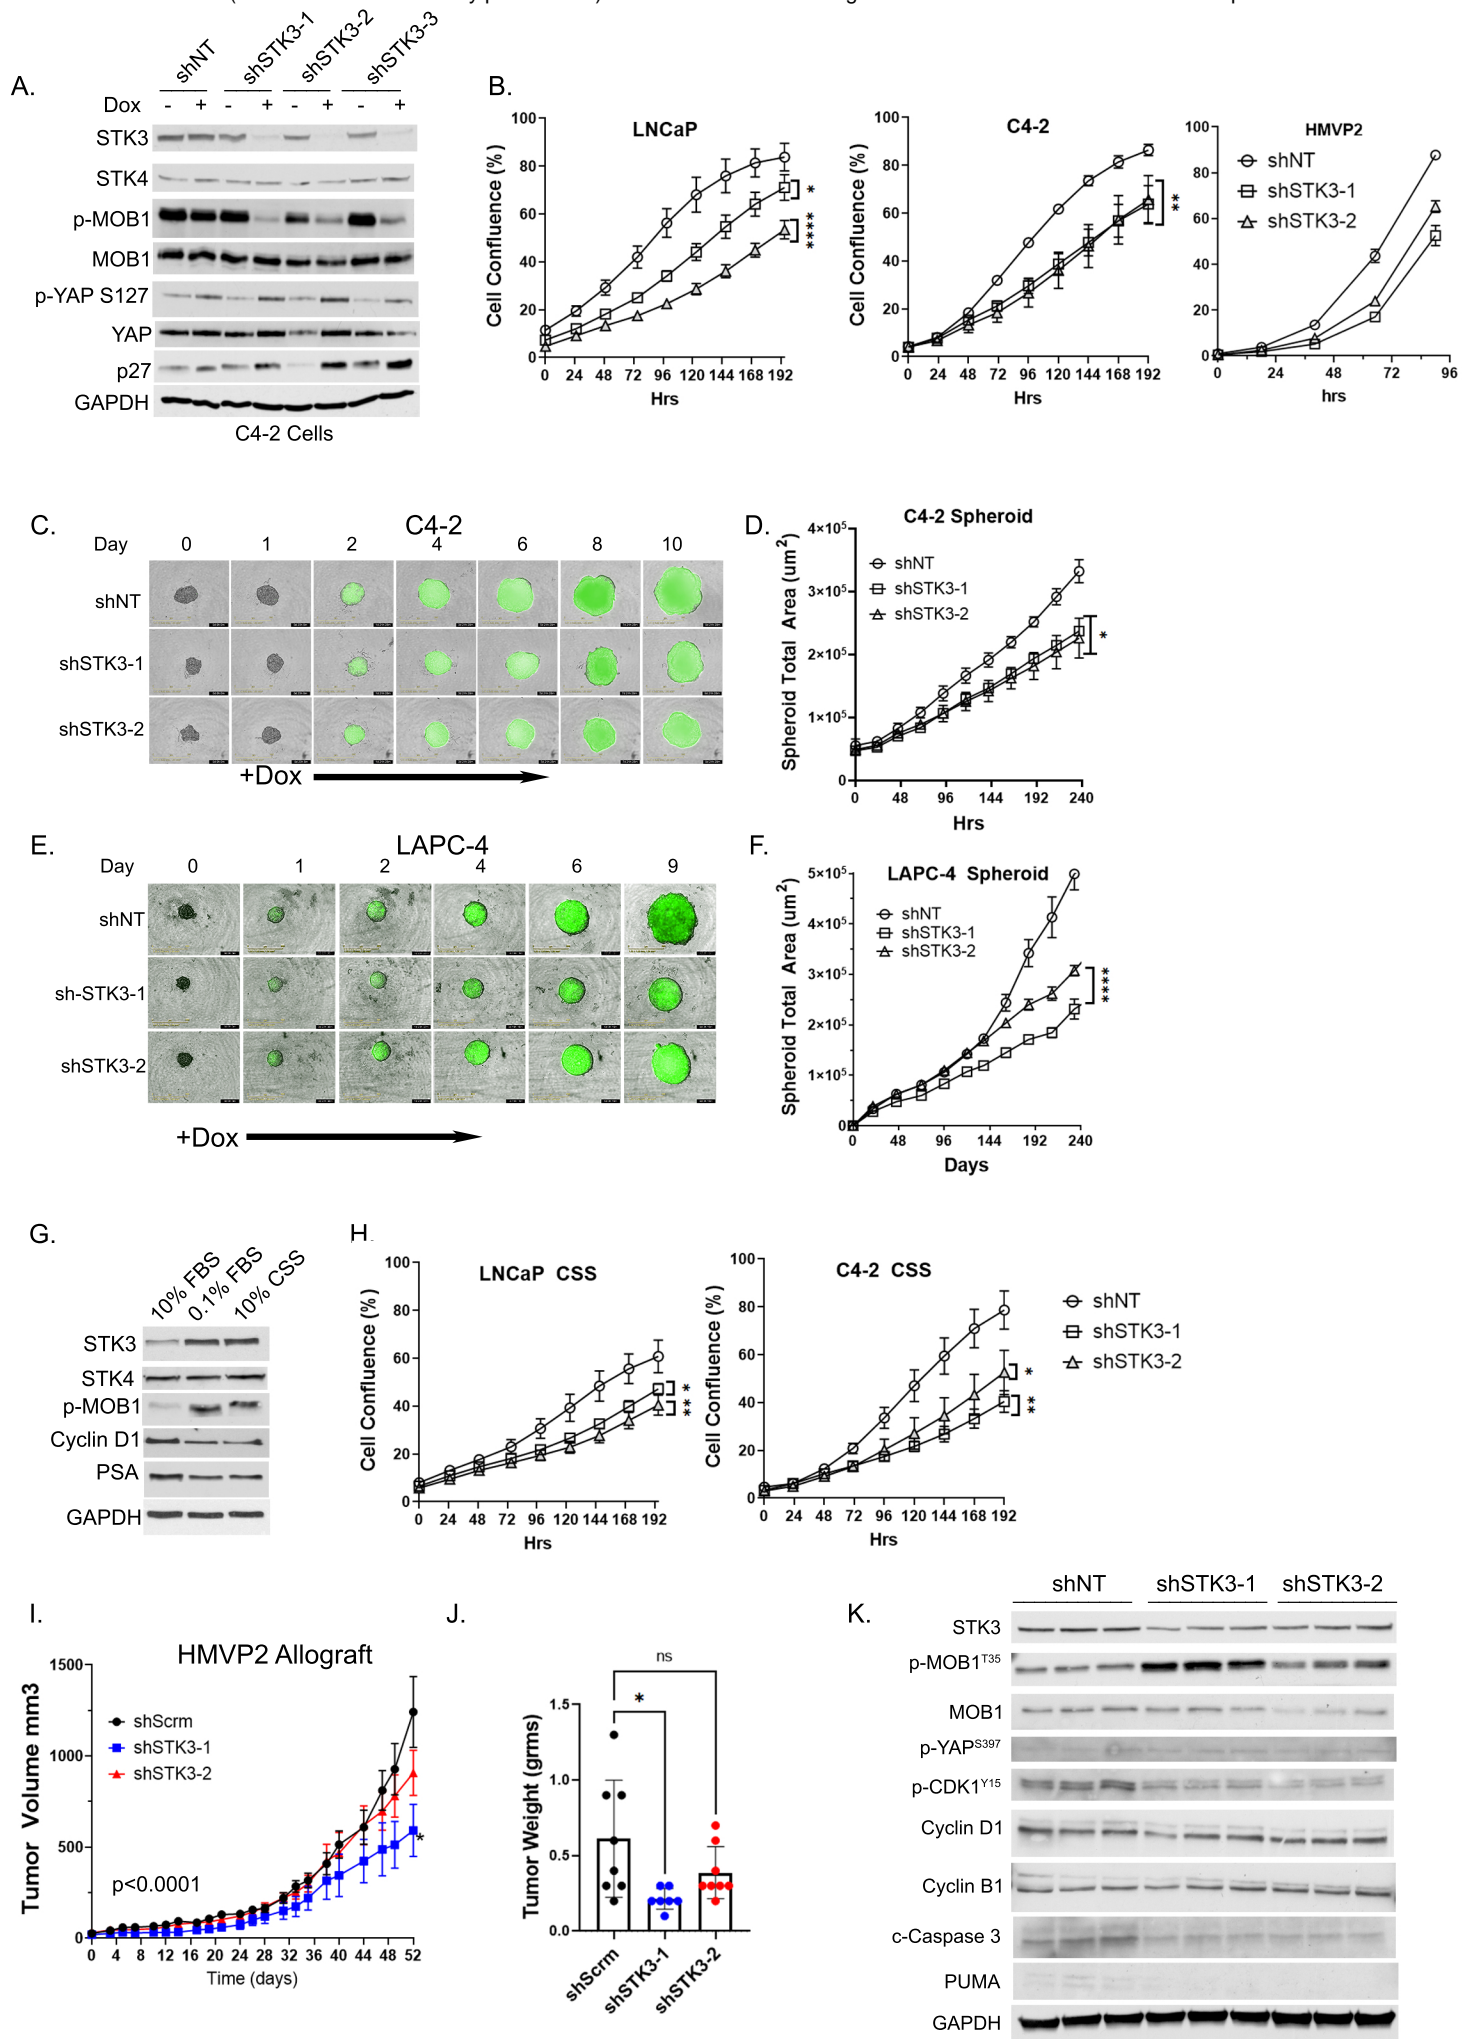

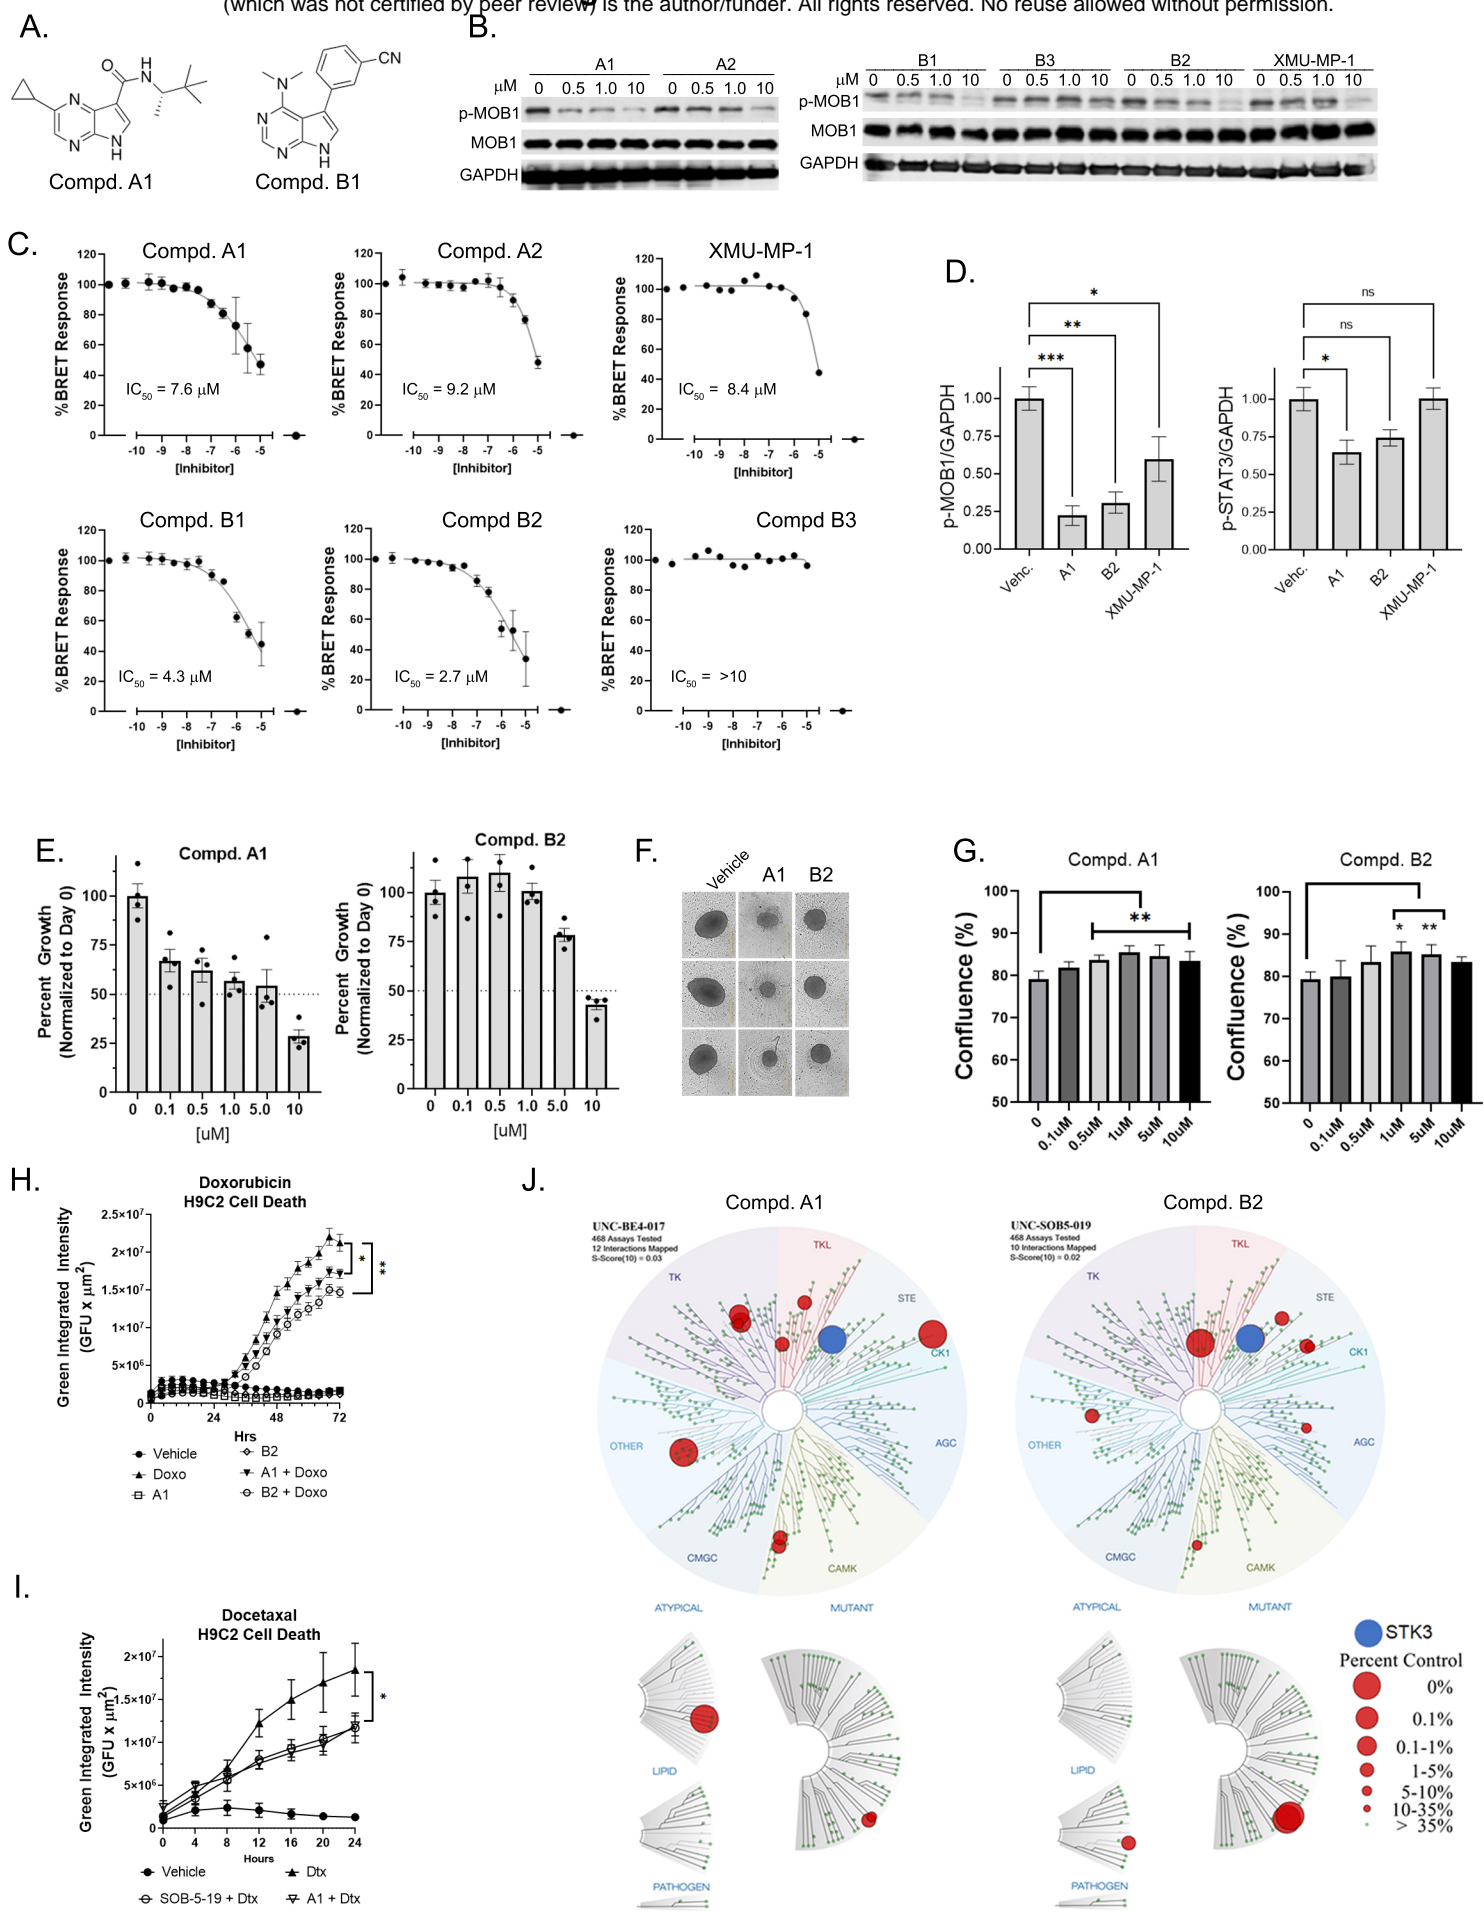

Table 1A. Pyrrolopyridazines (Series A) MST family selectivity and NB correlation with literature compound (XMU-MP-1) for comparison. STK3 IC<sub>50</sub> and STK3, STK4, 2, 3 and 4 % activity remaining determinations performed in an enzyme assay at E<sub>m</sub> of ATP.

| Compound | Alias         | STK3 Enzyme IC <sub>50</sub> (nM) | STK3 NB IC <sub>50</sub> (μM) | STK3 % activity remaining (1μM) | STK4 % activity remaining (1μM) | MST3 % activity remaining (1μM) | MST4 % activity remaining (1μM) |
|----------|---------------|-----------------------------------|-------------------------------|---------------------------------|---------------------------------|---------------------------------|---------------------------------|
| A4       | UNC-BE4-36-1  | 124                               | 2.1                           |                                 | 4                               | 9                               | 51                              |
| A3       | UNC-BE4-035   | 7                                 | 2.0                           |                                 | 2                               | 6                               | 27                              |
| A1       | UNC-BE4-017   | 41                                | 7.6                           |                                 | 2                               | 4                               | 19                              |
| A5       | UNC-BE4-040-1 | 391                               | >10                           |                                 | 39                              | 21                              | 74                              |
| XMU-MP-1 |               | 635                               | 8.4                           |                                 | 14                              | 15                              | 40                              |
| A2       | UNC-BE4-018   | 195                               | 9.2                           | 15                              | 7                               | 12                              | 54                              |
| A6       | UNC-BE4-032   |                                   | >10                           | 44                              | 26                              | 31                              | 74                              |
| A7       | UNC-BE4-019   |                                   | >10                           | 62                              | 37                              | 54                              | 52                              |
| A8       | UNC-BE4-021   |                                   | >10                           | 70                              | 61                              | 70                              | 30                              |
| A9       | UNC-BE4-031   |                                   | >10                           | 82                              | 98                              | 92                              | 106                             |
| A10      | UNC-BE4-002   |                                   | >10                           | 86                              | 79                              | 73                              | 78                              |
| A11      | UNC-BE4-033   |                                   | >10                           | 89                              | 36                              | 60                              | 71                              |
| A12      | UNC-BE4-020   |                                   | >10                           | 92                              | 89                              | 79                              | 86                              |
| A13      | UNC-BE4-036   |                                   | >10                           | 138                             | 84                              | 85                              | 82                              |

NB = NanoBRET

Table 1B. Pyrrolopyrimidine (Series B) MST kinase family selectivity and NB correlation with literature compound (XMU-MP-1) for comparison. STK3 IC<sub>50</sub> and STK3, STK4, 2, 3 and 4 % activity remaining determinations performed in an enzyme assay at Eurofins at the K<sub>m</sub> of ATP.

| Compound | Alias        | STK3 IC <sub>50</sub> (nM) | STK3 NB IC <sub>50</sub> (μM) | STK3 % activity remaining (1μM) | STK4 % activity remaining (1μM) | MST3 % activity remaining (1μM) | MST4 % activity remaining (1μM) |
|----------|--------------|----------------------------|-------------------------------|---------------------------------|---------------------------------|---------------------------------|---------------------------------|
| B6       | UNC-SOB-5-47 | 28                         | 0.7                           |                                 | 2                               | 24                              | 55                              |
| B5       | UNC-SOB-5-33 | 57                         | 1.6                           | 6                               | 11                              | 14                              | 34                              |
| B2       | UNC-SOB-5-19 | 33                         | 2.7                           | 23                              | 6                               | 36                              | 60                              |
| B4       | UNC-SOB-5-32 | 142                        | 5.0                           | 2                               | 10                              | 62                              | 85                              |
| B7       | UNC-SOB-5-34 | 53                         | 2.3                           | 9                               | 6                               | 33                              | 42                              |
| B1       | UNC-SOB-5-16 | 113                        | 4.3                           | 17                              | 6                               | 29                              | 27                              |
| B8       | UNC-SOB-5-54 | 283                        | 5.7                           | 30                              | 14                              | 54                              | 32                              |
| B9       | UNC-SOB-5-48 | 80                         | 5.0                           | 19                              | 9                               | 51                              | 68                              |
| B10      | UNC-SOB-5-46 |                            | 8.6                           | 47                              | 32                              | 56                              | 62                              |
| XMU-MP-1 |              | 635                        | 8.4                           |                                 | 14                              | 15                              | 40                              |
| B11      | UNC-SOB-5-31 | 299                        | >10                           | 6                               | 12                              | 65                              | 99                              |
| B12      | UNC-SOB-5-18 |                            | >10                           | 39                              | 35                              | 74                              | 72                              |
| B13      | UNC-SOB-5-51 |                            | >10                           | 49                              | 36                              | 69                              | 81                              |
| B14      | UNC-SOB-5-53 |                            | >10                           | 63                              | 44                              | 75                              | 54                              |
| B15      | UNC-SOB-5-49 |                            | >10                           | 74                              | 44                              | 80                              | 87                              |
| B16      | UNC-SOB-5-50 |                            | >10                           | 76                              | 61                              | 81                              | 55                              |
| B17      | UNC-SOB-5-52 |                            | >10                           | 78                              | 59                              | 77                              | 72                              |
| B18      | UNC-SOB-5-29 |                            | >10                           | 78                              | 81                              | 78                              | 84                              |
| B19      | UNC-SOB-5-45 |                            | >10                           | 104                             | 89                              | 85                              | 85                              |
| B3       | UNC-SOB-5-17 |                            | >10                           | 113                             | 61                              | 79                              | 82                              |

NB = NanoBRET



A.

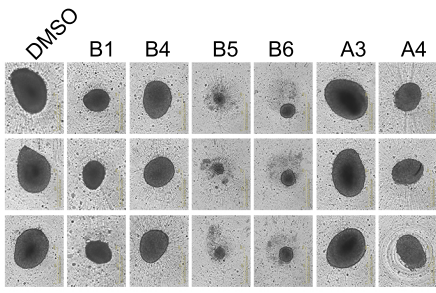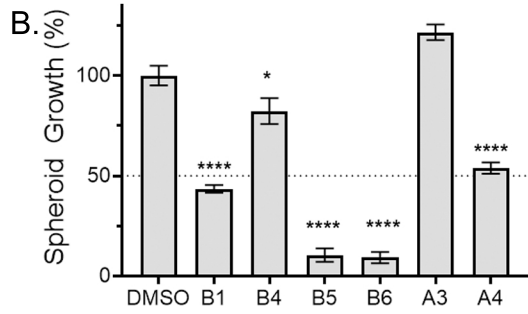

C.

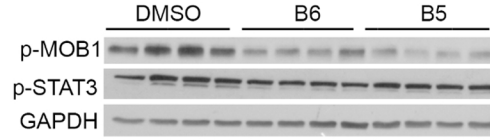

D.

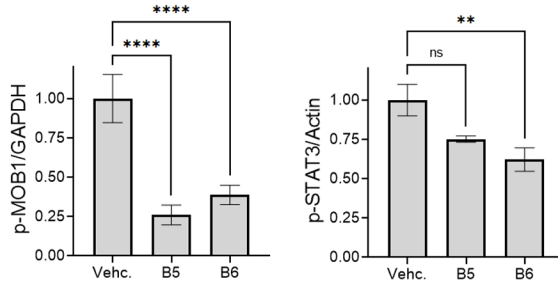

E.

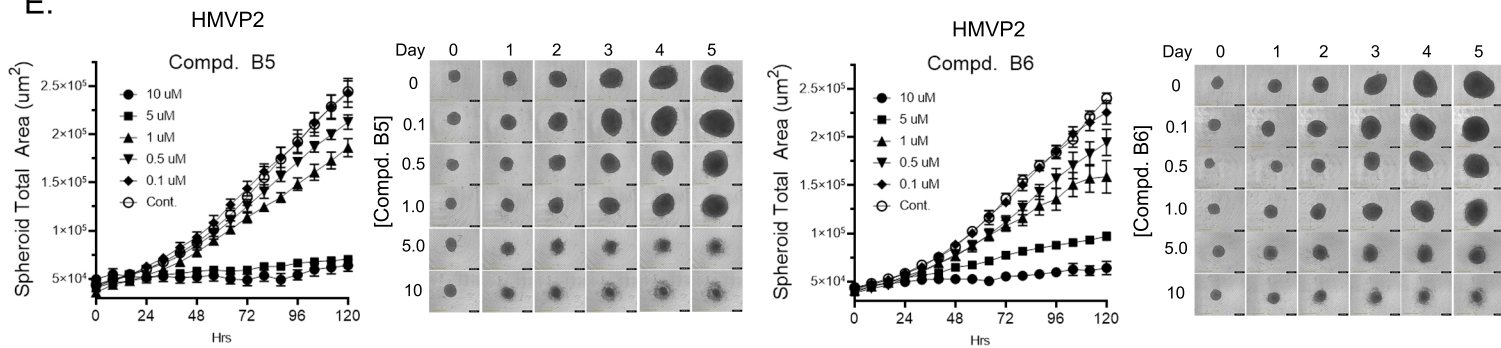

F.

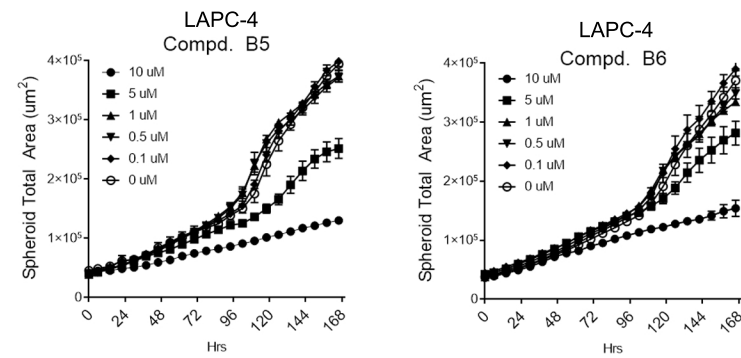

G.

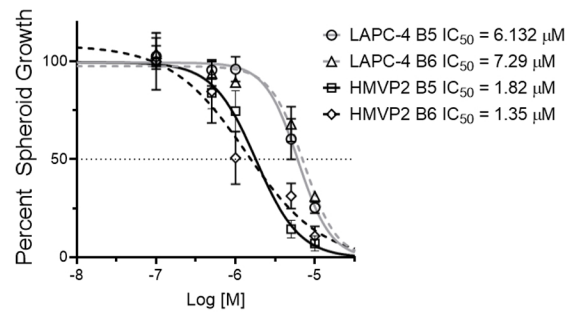

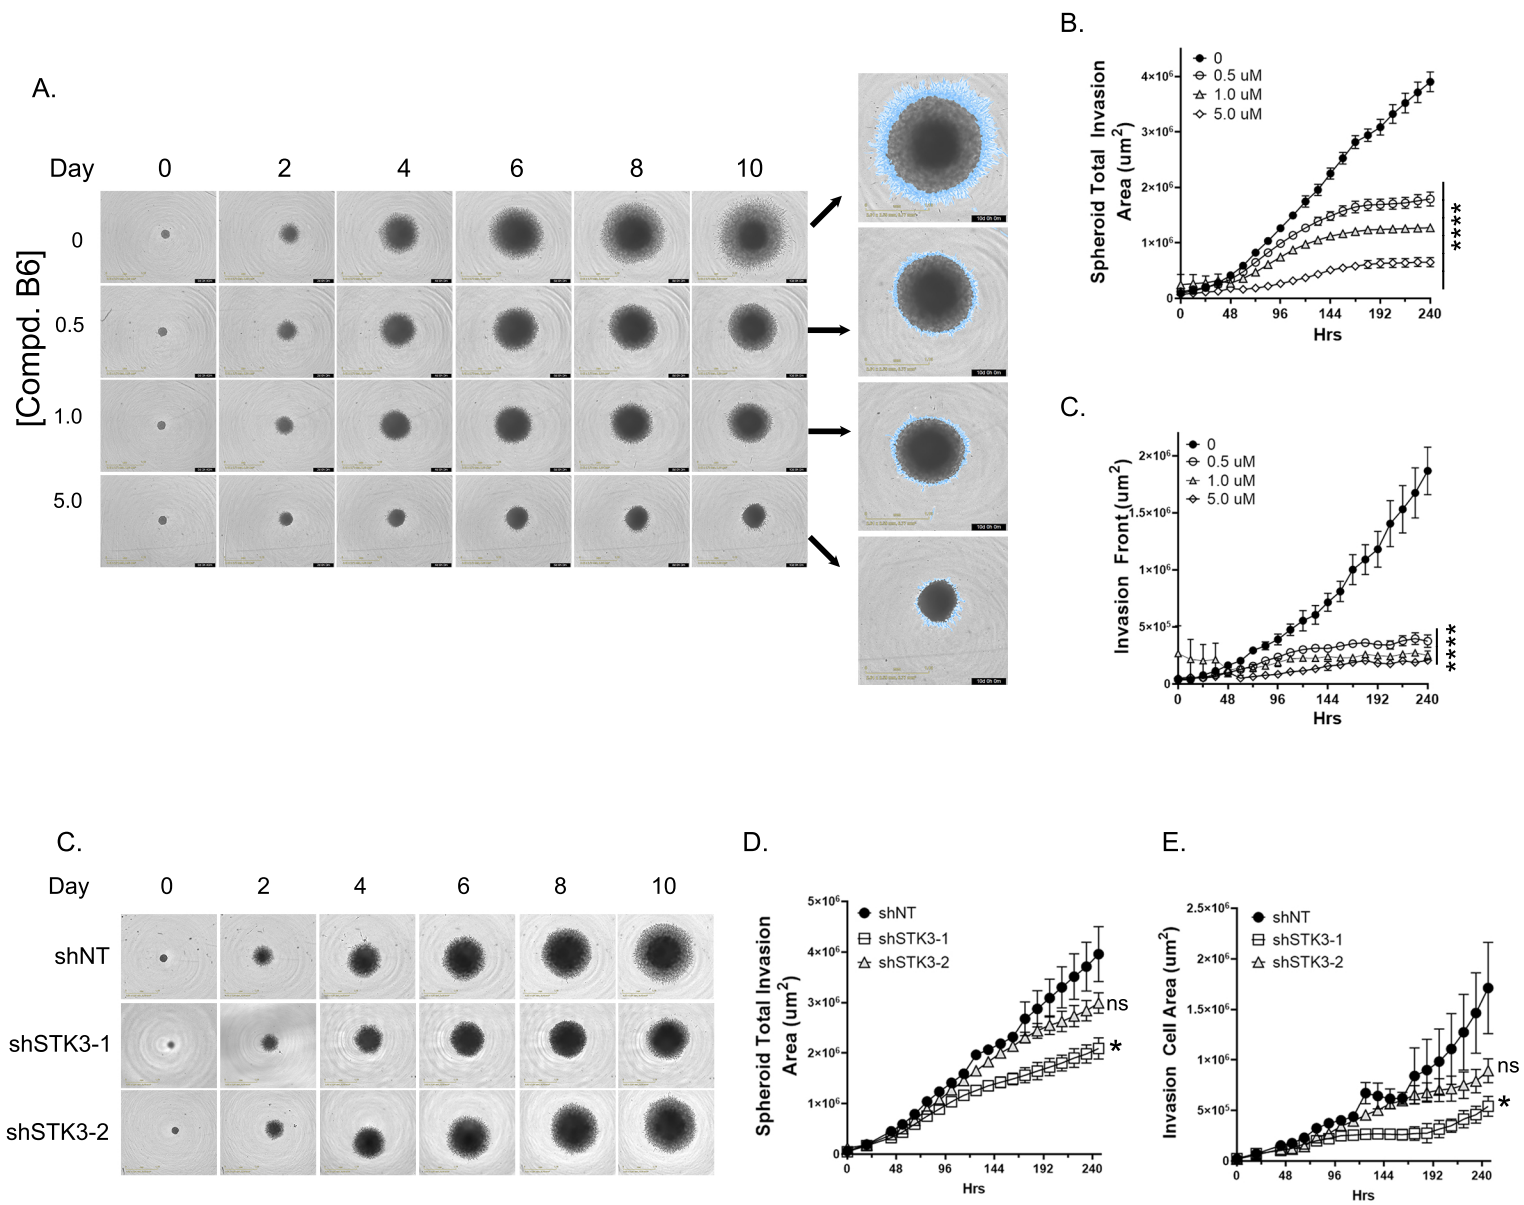

Source: https://www.biorxiv.org/content/10.1101/2021.02.21.432137v1.full.pdf
